# Supplementary material for: Cell Cycle Regulation of Hippocampal Progenitor Cells in Experimental Models of Depression and after Treatment with Fluoxetine
Source: MDPI journal article supplement (doi:10.3390/ijms222111798), 2021-10-30
Supplement: s1 [file s1]

## SUPPLEMENTARY MATERIALS

|           | Mon              | Tue                                  | Wed                           | Thu           | Fri                              | Sat           | Sun |
|-----------|------------------|--------------------------------------|-------------------------------|---------------|----------------------------------|---------------|-----|
| 9h - 10h  | Confinement      | Inaccessible Food                    | Empty Bottle                  | Startle Noise | Confinement                      |               |     |
| 10h - 11h |                  |                                      | Strobe Lights                 |               | Tilted Cage                      |               |     |
| 11h - 12h | Overcrowding     |                                      |                               |               |                                  |               |     |
| 12h - 13h |                  | Strobe Lights                        | Tilted cage                   | Overcrowding  |                                  | Strobe Lights |     |
| 13h - 14h |                  |                                      |                               |               |                                  |               |     |
| 14h - 15h | Tilted cage      | Startle Noise                        | Confinement                   |               |                                  |               |     |
| 15h - 18h |                  |                                      |                               |               |                                  |               |     |
| O/N       | Food Deprivation | water Deprivation + O/N Illumination | Strobe lights (low frequency) | Wet Bed       | Reverse Light/dark + Tilted Cage |               |     |

**Supplementary Figure S1: *uCMS* protocol** (one week example). The order of each stressor (confinement, strobe lights, tilted cage, food/water deprivation, overcrowding, O/N illumination, empty bottle, startle noise, wet bed, reverse light/dark hours) changed every week throughout the 6 weeks protocol. During the last 2 weeks of the protocol, Fluoxetine was administered in the afternoon, between 2 and 4 p.m.

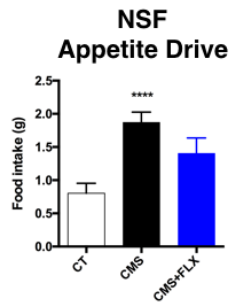

**Supplementary Figure S2:** *Food intake assessment after the Novelty Suppressed Feeding Test.* To validate significant changes in latency to feed assessed by this behavioral paradigm, alterations in appetite drive must be characterized. In this way, a significant increase in latency to feed (anxiety-like behavior) can only be validated when not accompanied by decreased appetite drive. Conversely, a significant increase in latency to feed (an anxiogenic effect) may only be considered when not associated with a significant decrease in appetite drive. Although uCMS-exposed animals presented significantly higher appetite drive when compared to CT (CT=0.8025 ± 0.1409 g vs uCMS=1.872 ± 0.1463 g,  $t_{18} = 5.264$ ,  $p < 0.0001$ ), they also showed an increased latency to feed, thus not configuring any of the above-mentioned situations. Error bars denote SEM. \*Denotes the effect of uCMS-exposure; #Denotes the effect of fluoxetine compared with untreated uCMS-exposed animals. \*\*\*\* $p < 0.0001$ . Abbreviations: uCMS: unpredictable chronic mild stress; FLX: fluoxetine.

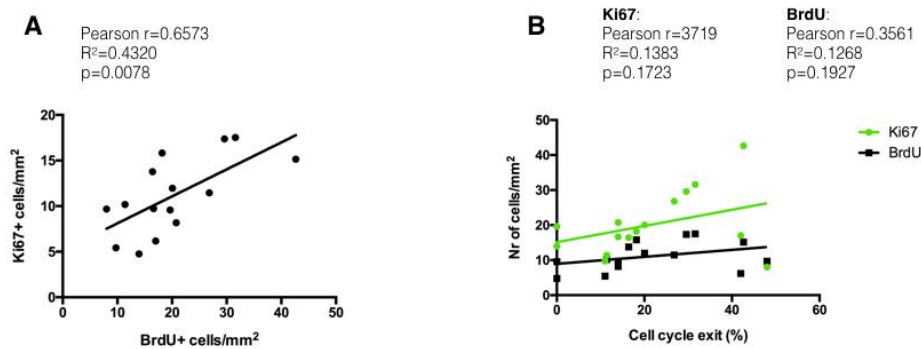

**Supplementary Figure S3: A.** Pearson correlation between the numbers of Ki67 and BrdU positive cells per  $\text{mm}^2$  in the DG. **B.** Pearson correlation between the numbers of BrdU positive or Ki67 positive cells per  $\text{mm}^2$  and the % of cells that have exited the cell cycle.

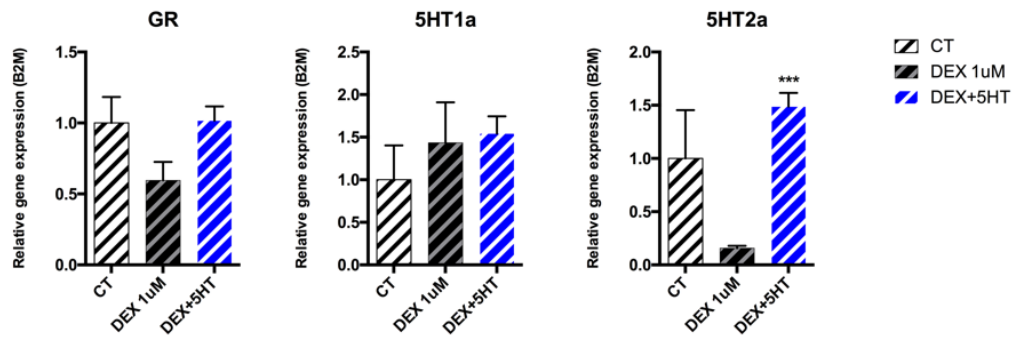

**Supplementary Figure S4:** Expression of glucocorticoid receptor and 5-HT receptors in the neurospheres, measured by qRT-PCR. DEX treatment did not induce statistically significant changes in the levels of GR, 5-HT1a or 5-HT2a. 5-HT could only significantly increase the expression of 5-HT2a when compared to DEX-treated cells ( $t_4=11.37$ ;  $p=0.0003$ ). Error bars denote SEM. \*Denotes the effect of fluoxetine compared with untreated uCMS-exposed animals. \*\*\* $p<0.001$ . Abbreviations: CT: Control; DEX: Dexamethasone, 5HT: serotonin, GR: glucocorticoid receptor; 5HT1a: serotonin receptor 1a; 5HT2a: serotonin receptor 2a.

**Supplementary Table S1:** list of primary and secondary antibodies used with catalogue numbers and RRIDs.

| <b>Designation</b>           | <b>Catalogue nr</b>          | <b>RRID</b> |
|------------------------------|------------------------------|-------------|
| Anti-Bromodeoxyuridin (BrdU) | Agilent Cat# M0744           | AB_10013660 |
| Anti-Doublecortin (DCX)      | Millipore Cat. No. AB2253    | -           |
| Anti-Ki67                    | Millipore Cat# AB9260        | AB_2142366  |
| Anti-Nestin                  | Millipore Cat# MAB353        | AB_94911    |
| Anti-GFAP                    | Agilent Cat# Z0334           | AB_10013382 |
| Anti- $\beta$ -3 tubulin     | Sigma-Aldrich Cat# T8660     | AB_477590   |
| Anti-O4                      | R and D Systems Cat# MAB1326 | AB_357617   |
| Anti-mouse Alexa-fluor® 488  | Catalog # A-11029            | -           |
| Anti-rabbit Alexa-fluor® 594 | Catalog # A-11037            | -           |
| Anti-mouse Alexa-fluor® 594  | Catalog # A-11005            | -           |
| Anti-rabbit Alexa-fluor® 488 | Catalog # A-11008            | -           |
| Anti-rat Alexa-fluor® 594    | Catalog # A-11007            | -           |
| Anti-mouse Alexa-fluor® 647  | Catalog # A-31571            | -           |

**Supplementary Table S2:** Sense and antisense sequences of oligonucleotide primers used in the quantitative real time polymerase chain reaction (qRT-PCR) and their corresponding product size.

| <b>Gene<br/>symbol</b> | <b>Sense</b>                  | <b>Antisense</b>             | <b>Product<br/>size (bp)</b> |
|------------------------|-------------------------------|------------------------------|------------------------------|
| <i>Cyclin D1</i>       | CGCGTACCCTGACACCAAT<br>CT     | CTTCTGCTCCTCGCAGACC<br>TCTA  | 172                          |
| <i>Cyclin D2</i>       | ACACCGATGTGGATTGTCT<br>CAAAG  | TCAACATCCCGCACGTCTG<br>TA    | 154                          |
| <i>Cyclin E</i>        | AGCAGTCAGCCTTGGGATG<br>AT     | AGGCTCTGGGCGGTCTGAT<br>TT    | 139                          |
| <i>Cyclin A</i>        | GGCCTTGTTCTCGAGACTT<br>CTATTC | CCCAAATCTTCCAGCATGG<br>TCTTA | 182                          |
| <i>Cdkn1a</i><br>(P21) | GCAGACCAGCCTAACAGAT<br>TTCTA  | TCCTGACCCACAGCAGAAG<br>AAG   | 109                          |
| <i>Cdkn1b</i><br>(P27) | CAGACGTAAACAGCTCCGA<br>ATTAAG | GCGCAATGCTACATCCAAT<br>GCT   | 221                          |
| <i>5-Htr1a</i>         | TCATCGGCTCCTTGGCGGT<br>T      | CCGGGGCGTCCTTTTGTTC<br>A     | 233                          |
| <i>5-Htr2a</i>         | ACCGACATGCCTCTCCATT<br>CTTC   | CAAAGGCCACCGGTACCCA<br>TACA  | 244                          |
| <i>GR</i>              | AGGCCGGTCAGTGTTTTCT           | CAATCGTTTCTTCCAGCAC<br>A     | 234                          |
| <i>B2M</i>             | GTGCTTGCCATTCAGAAAA<br>CTCC   | AGGTGGGTGGAAGTGA<br>CA       | 136                          |

**Supplementary Table S3:** Mann Whitney test results and corresponding p-values for comparisons between datasets which did not follow a normal distribution.

| Test and comparison            | Mann<br>Whitney U | p-value |
|--------------------------------|-------------------|---------|
| <b>FST</b>                     |                   |         |
| CT vs uCMS                     | 5                 | 0.0295  |
| uCMS vs uCMS +FLX              | 5                 | 0.0127  |
|                                |                   |         |
| <b>SCT</b>                     |                   |         |
| CT vs uCMS                     | 25                | 0.0067  |
| uCMS vs uCMS +FLX              | 37                | 0.0072  |
|                                |                   |         |
| <b>Cell Cycle exit</b>         |                   |         |
| CT vs uCMS                     | 20                | 0.3782  |
| uCMS vs uCMS +FLX              | 3.5               | 0.4167  |
|                                |                   |         |
| <b>Cyclin D1 DG expression</b> |                   |         |
| CT vs uCMS                     | 1                 | 0.0317  |
| uCMS vs uCMS +FLX              | 7                 | 0.1775  |
|                                |                   |         |
| <b>P21 expression NSPs</b>     |                   |         |
| CT vs uCMS                     | 20                | 0.6620  |
| uCMS vs uCMS +FLX              | 9                 | 0.3290  |
|                                |                   |         |
| <b>P57 expression NSPs</b>     |                   |         |
| CT vs uCMS                     | 5                 | 0.3810  |
| uCMS vs uCMS +FLX              | 2                 | 0.400   |
|                                |                   |         |
|                                |                   |         |
|                                |                   |         |
|                                |                   |         |
